# Supplementary material for: Democratizing type 1 diabetes specialty care in the primary care setting to reduce health disparities: project extension for community healthcare outcomes (ECHO) T1D
Source: HighWire-hosted journal article supplement (doi:10.1136/bmjdrc-2021-002262), 2021-07-01
Supplement: bmjdrc-2021-002262supp001_data_supplement.pdf [file bmjdrc-2021-002262supp001_data_supplement.pdf]

## **Appendix A. Project ECHO Diabetes Working Group**

### **Hub Teams:**

#### University of Florida

Michael Haller, MD  
Ashby Walker, PhD, MA  
Eleni Sheehan, ARNP, FNP, CDCES  
Angelina Bernier, MD  
Sarah Westen, PhD  
Hui Hu, Ph.D.  
Matthew Gurka, Ph.D.  
Stephanie Filipp, MPH  
Jill Herndon, Ph.D.

William Troy Donahoo, MD, FTOS  
Claudia Anez-Zabala, BS  
Xanadu Roque, BS  
Christina DeRemer, PharmD, BCPS,  
BCACP, FASHP

#### Stanford University

David Maahs, MD, PhD  
Nicolas Cuttriss, MD, MPH  
Lauren Figg, LMSW  
Catherine Clark, PhD  
Linda Baer, MSPH, CHCP  
Katarina Yabut, BS  
Dessi Zaharieva, PhD  
Rayhan Lal, MD

Marina Basina, MD  
Magdalena Ford, RN, MSN, FNP-C, CDE  
Korey Hood, PhD  
Jessie Wong, PhD  
Jason Wang, MD, PhD  
Suruchi Bhatia, MD  
Eugene Lewit, PhD

### **Spoke Sites:**

#### University of Florida

Jessie Trice Community Health Systems  
- Champion: Joycelyn Lawrence, MD

Miami Beach Community Health Center  
- Champions: Ramon Martinez, MD; Johann  
Torres, MD

Healthcare Network of SWFL  
- Champion: Corin DeChirico, DO, FACP,  
CPE

UF Health Family Medicine at Eastside  
- Champion: Elvira Mercado, MD

UF Health Family Medicine at Old Town  
- Champions: Jason Konopack, MD, MPH;  
Brian Fitzgerald, MD

Community Health Centers of Pinellas  
(Pediatric Center)  
- Champions: Sarah Kelley, MD; Nichelle  
Threadgill, DO

UF Student Health Care Center  
- Champion: Hannah Stahmer, RDN, CDE

Help A Diabetic Child Foundation  
-Champion: Joe Balavage

Stanford University

Harmony Health Medical Clinic  
- Champion: Craig Rhoades, PA-C, RD

Humboldt Independent Practice Association  
- Champions: Karen Ayers, NP; Linda Cade, FNP, CDE

Open Door Community Health Centers  
- Champion: Chris West, NP

Solano County Family Health Services  
- Champion: Jay Shubrook, MD

Tahoe Forest Multispecialty Clinics  
- Champion: Samantha Smith, PA

Mendocino Community Health Clinics –  
Dora Street Health Center

- Champion: Sarah Alvord, MD  
Salud Para La Gente  
- Champion: Devon Francis, MD

United Indian Health Services  
- Champions: Terry Raymer, MD; Kristi Colbert, RN

Mendocino Coast Clinics  
- Champion: Jennifer Salyer, RN

Valley Diabetes and Obesity  
- Champion: Gopika Gangupantula, MD

**Diabetes Support Coaches:**University of Florida

Leon Bain  
Emily Bennett  
Christian Iglesias-Velez  
Rouselind Ortega-Simth

Monica Ramos, RN  
Zaylu Delgado  
Xanadu Roque, BS

Stanford University

Elizabeth Murphy, RN  
Amy McClelland  
Charles Willis

Judy Ghera  
Mario Leal

**Partner Network Leaders, Research Specialists, and Coordinators:**Health Choice Network (FL):

Diana Chavez, HCMBA, CMA, CLSSGB  
Dyanne Cardenas, MSIS  
Meredith Marsh, BS  
Terisa James, MSW
